# Supplementary material
Source: PubMed Central journal article supplement (PMC2804825)

Dixon et al., Supplemental Figure 1

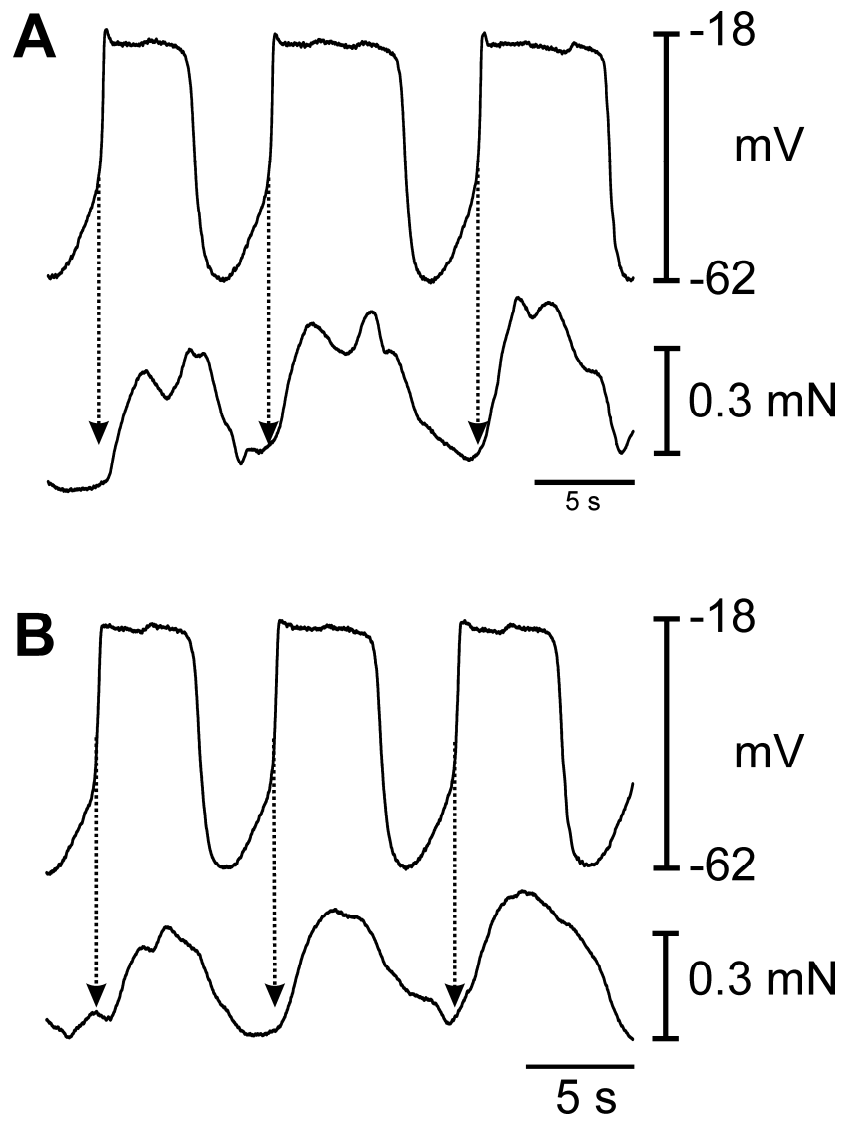

Supplement: supp_108.073833_biolreprod.108.073833-1.pdf [file supp_108.073833_biolreprod.108.073833-1.pdf]

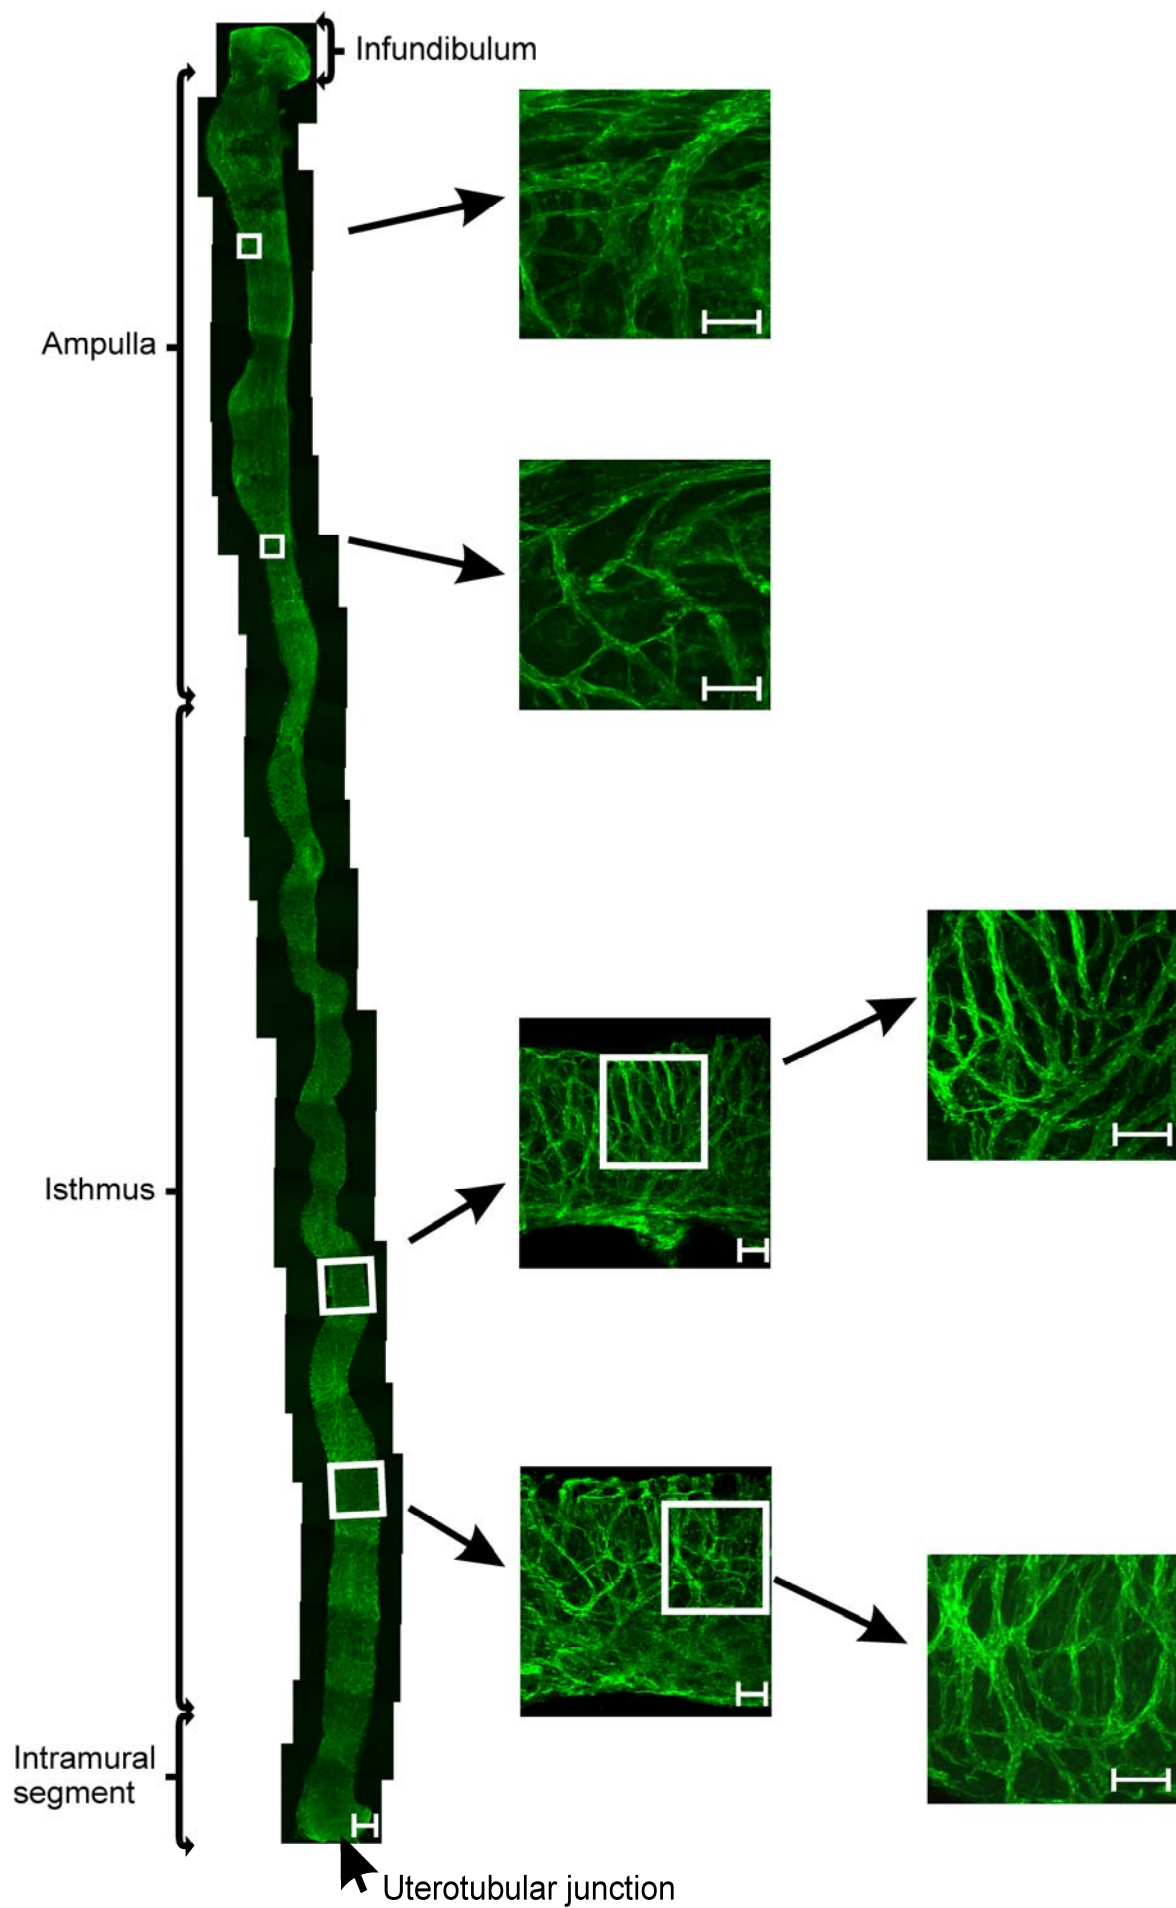

Supplement: supp_108.073833_biolreprod.108.073833-2.pdf [file supp_108.073833_biolreprod.108.073833-2.pdf]
